# Supplementary material
Source: Springer Nature journal article supplement (https://www.springermedizin.de/resource/supplementary/12947_2009_310_MOESM3_ESM.pdf/9556792)

### Regression on Statins + Lifestyle Changes

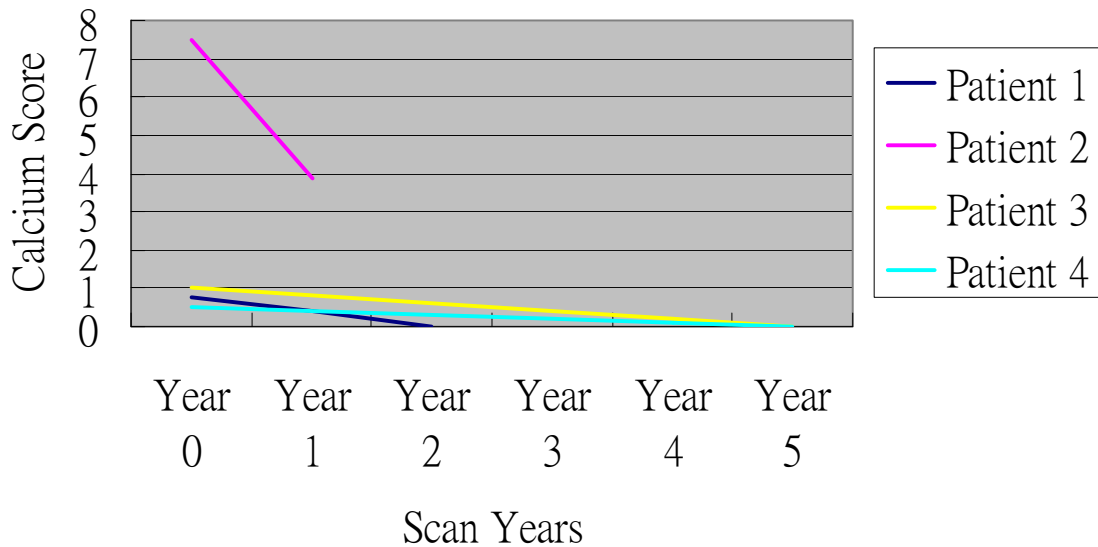

### Regression on Statins + Lifestyle Changes

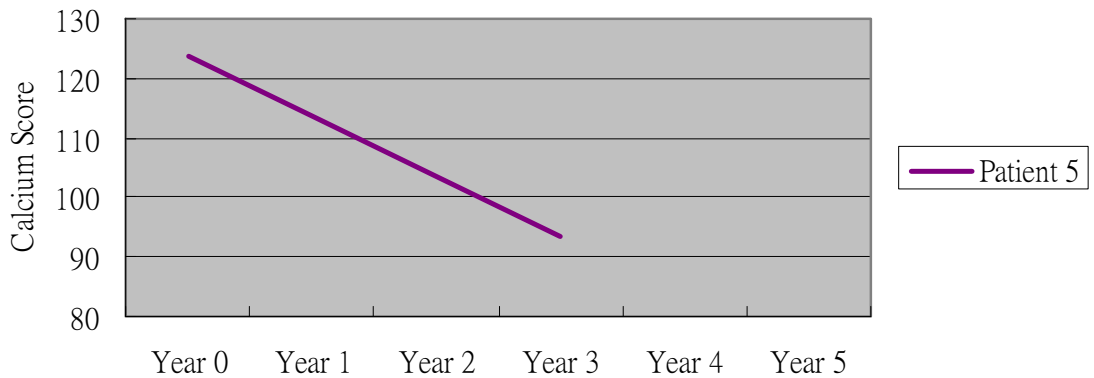

Supplement: MOESM3 [file 9556792]
